# Supplementary material
Source: PubMed Central journal article supplement (PMC4836422)
Supplement: AEM.03493-15_zam999117090so1.pdf [file AEM.03493-15_zam999117090so1.pdf]

# Metagenomic Analyses of the Autotrophic Fe(II)-Oxidizing, Nitrate-Reducing Enrichment Culture KS

Shaomei He<sup>1,2,3,\*</sup>, Claudia Tominski<sup>4</sup>, Andreas Kappler<sup>4</sup>, Sebastian Behrens<sup>5,6</sup>, and Eric E. Roden<sup>1,3\*</sup>

## SUPPLEMENTARY INFORMATION

Including:

Supplementary Texts (1-9)

Supplementary Reference

Supplementary Figure Legends

Supplementary Figures (1-8)

Supplementary Tables (1-3)

## SUPPLEMENTARY TEXTS

### Supplementary Text 1. More discussion on metagenome binning

Although the coverage of several *Bradyrhizobium* contigs deviated from the majority coverage of the *Bradyrhizobium* bin (**Figure S2a**), these contigs indeed belong to the *Bradyrhizobium* bin, supported by other binning criteria such as sequence homology and tetranucleotide frequency, and these contigs likely originated from plasmids, as suggested by the presence of plasmid associated genes on these contigs.

Notably, *Rhizobium* bin was the second most abundant bin in the KS-Mad metagenome, yet was represented by many short fragments (**Table 1**), and consisted of at least two coverage groups, with the major coverage around 600 X (**Figure S2a**). In addition to the presence of plasmids, some of these low-coverage contigs are likely from very closely related strains of *Rhizobium*, as suggested by the presence of several redundant essential single-copy genes in low-coverage contigs. Indeed, the co-existence of closely related strains may have made it difficult to assemble their reads into long contigs (despite being present at very high abundances) when using short-read assemblers, due to the presence of identical regions among these strains. For

simplicity, we grouped all these *Rhizobium* contigs into a composite bin, with the majority of sequences contributed by the most abundant *Rhizobium* strain in the culture.

## **Supplementary Text 2. Comparison of the Mad and Tueb versions of *Gallionellaceae* sp. genomes**

The *Gallionellaceae* genomes in the two enrichment cultures are nearly identical except for some very minor differences at the ends of contigs, which were likely due to the usual assembly artifacts at the ends of contigs. However, there are two major differences between these two genomes that we think are real. First, in KS-Mad, there is a deletion of a 170-bp fragment in the middle of a gene, which is annotated as “adenylate and guanylate cyclase catalytic domain/AsmA-like C-terminal region” in KS-Tueb (IMG gene OID 2566081571). Therefore, this gene was broken into two shorter fragments (2566094026 and 2566094027) in KS-Mad. The base coverage along Gene 2566081571 was consistent when mapping KS-Tueb metagenome reads to Gene 2566081571, however, when mapping KS-Mad metagenome reads to Gene 2566081571, the coverage dropped to zero at the 170-bp deletion region, confirming that the 170-bp deletion in KS-Mad genome is real, and is not due to assembly artifacts. The other difference lies in a 46805-bp contig in KS-Tueb (IMG Scaffold ID 2565963370), which has a coverage about four times higher than the average coverage of the rest contigs in KS-Tueb *Gallionellaceae* sp. genome. However, in KS-Mad, this fragment is part of a larger contig (IMG Scaffold ID 2565963526, 206118-bp long), which has an even coverage along the contig, and is consistent with the coverage of the rest contigs in KS-Mad *Gallionellaceae* sp. genome. Mapping KS-Mad metagenome reads to KS-Mad Contig 2565963526 has a consistent coverage along the contig, and is also consistent with other contigs in the genome, indicating that this contig is from chromosomal DNA in KS-Mad *Gallionellaceae* sp. genome. However, mapping KS-Tueb reads to KS-Mad Contig 2565963526 clearly indicates that the beginning ~46 kbp region on this contig has a coverage about 4 times higher than the remaining ~160 kbp region on this contig, confirming that these two regions are indeed two separate fragments with different copy numbers in KS-Tueb *Gallionellaceae* sp. genome. Therefore, contig

2565963370 in KS-Tueb is likely from a plasmid, which can have multiple copies in a cell, rather than from the chromosome, which has only one copy in the genome.

### **Supplementary Text 3. Taxonomy of Culture KS *Gallionellaceae* sp. and comparison to ES-1 and ES-2**

Based on the 16S rRNA gene sequence, the *Gallionellaceae* species in Culture KS is more similar to ES-1 (95-96% identical) than to ES-2 (94% identical). However, its essential single-copy genes are more similar to ES-2 than to ES-1 (**Figure S1**), and the phylogenetic tree constructed using conserved phylogenetic marker genes also indicated that the *Gallionellaceae* sp. in KS is more affiliated with ES-2 than with ES-1 (**Figure S3**). When considering the entire genome, about 51% and 52% of KS *Gallionellaceae* sp. proteins match with ES-1 and ES-2 respectively with a  $<1e-5$  E-value, a  $>60\%$  sequence identity and a  $>50\%$  alignable region on the query sequence as the cutoff. These numbers increased to 71% and 68% respectively when the sequence identity cutoff was decreased to 30%. Recently, the percentage of conserved proteins (POCP) between two organisms defined by  $>40\%$  sequence identity and  $>50\%$  alignable region on the query sequence was used to assess evolutionary and phenotypic distance, and a POCP of 50% was proposed to define the genus boundary (1). According to that, the POCP is 56% between ES-1 and ES-2, 60% between KS *Gallionellaceae* sp. and ES-1, and 59% between KS *Gallionellaceae* sp. and ES-2. As ES-1 and ES-2 represent different genera, their POCP value suggests that the 50% cutoff is probably too low to distinguish genera within *Gallionellaceae*, and this is probably due to the relative small genomes ( $\sim 3$ Mbp) of members within this family. Thus, the POCP cannot resolve the genus to which the *Gallionellaceae* sp. in Culture KS belongs. Overall, using the criteria discussed above, we cannot unambiguously determine whether *Gallionellaceae* sp. in KS belongs to either *Sideroxydans* or *Gallionella*, or represents a novel genus. More genome sequences from this family may help to resolve its phylogeny in the future. In this manuscript, we tentatively refer to the primary Fe(II)-oxidizer in Culture KS as *Gallionellaceae* sp., and comparison of its genetic features and metabolisms with ES-1 and ES-2 is presented in more detail below.

#### Supplementary Text 4. Other porin-periplasmic cytc/MCO gene clusters

We also performed a broader search for gene clusters potentially encoding “porin-periplasmic cytc” or “porin-periplasmic MCO” complexes that were not previously recognized, and found interesting cases in *Gallionellaceae* sp., *Bradyrhizobium* sp., *Comamonadaceae* sp., and *Rhodanobacter* sp.

We found cytc or the cytochrome *cd<sub>1</sub>*-containing nitrite reductase (NirS) genes next to porin-coding genes that are annotated as outer membrane receptors (OMR) involved in assimilatory iron uptake in *Gallionellaceae* sp., *Comamonadaceae* sp. and *Bradyrhizobium* sp. (**Figure S5a**), and we also found the clustering of NirS and OMR genes in ES-1 genome. Iron uptake with OMRs is usually facilitated by the TonB-dependent transporter system, but interestingly, in these cases, other genes in the TonB-dependent transporter system (including TonB and ExbB/D) are not in the vicinity of the OMR gene, probably suggesting that these OMRs are involved in functions other than iron uptake. As the cytc/*nirS* is not always in the same operon as the OMR gene, it is not clear whether their clustering in the genome is merely a coincidence, or suggesting an interaction between them. If they are involved in EET, as these cytc/NirS have only one to three heme-binding sites, they probably cannot form a conductive wire similar to MtoA.

In addition to porin-cytc, we also searched for porin-MCO, since MCO is another type of enzyme involved in metal redox reactions, such as Mn(II) oxidation (2), Fe(III) reduction (3) and Cu(I) oxidation which confers copper resistance (4). We found a periplasmic MCO in the same operon as a porin-like protein in *Comamonadaceae* sp. and *Rhodanobacter* sp. from the KS cultures (**Figure S5b**). This type of porin-MCO was previously identified in Fe(II)-oxidizing *Bradyrhizobium japonicum* strain 22 as its best candidate system for EET, since neither outer membrane/extracellular redox active enzyme nor any porin-cytochrome system is present in its genome (L. Shi and E. Roden, unpublished data). However, porin-MCO was not present in *Bradyrhizobium* sp. in the KS metagenomes. We also identified such a porin-MCO system in several iron redox cycling bacteria isolated from Hanford subsurface (5), including *Cupriavidus necator* A5-1, *Bradyrhizobium japonicum* strain is5 and strain in8p8. In addition, we also found this porin-MCO in nitrate-reducing Fe(II)-oxidizing *Thiobacillus denitrificans* strains, and in a *Ralstonia* sp. genome constructed from a pyrite-oxidizing enrichment culture (Percak-Dennett et al., in preparation). In all these cases, the MCO and the associated porin belong to the PcoA and

PcoB protein families, respectively (**Figure S5b**). PcoAB were initially identified in *Escherichia coli* as components of a plasmid-borne copper-resistance operon (*pco*) (6), and are homologous to CopAB in a copper-resistance operon (*cop*) in *Pseudomonas syringae* (7). Among proteins encoded by the *pco* or *cop* operon, PcoAB or CopAB are essential to the resistance (8), and are more conserved in bacterial genomes than other components in the operon (9).

It is believed that PcoA detoxifies copper by oxidizing siderophores (which subsequently chelate and sequester Cu(I)), or by directly oxidizing the extremely toxic Cu(I) to less toxic Cu(II) (4, 9). Notably, PcoA may have a broad substrate spectrum and was suggested to oxidize compounds other than Cu(I) and siderophores. For example, PcoA in *P. aeruginosa* was demonstrated to exhibit a ferroxidase activity and play a role in iron acquisition by oxidizing Fe(II) to Fe(III) for subsequent transport using Fe(III) transporters (10). Therefore, it is plausible that PcoA in these iron redox cycling bacteria can also oxidize Fe(II), supported by the observation that some of their PcoA proteins have the EXXE iron-binding motif.

The role of PcoB in copper resistance is less understood, but PcoB may interact with PcoA and perform a putative function in exporting Cu(II) across the outer membrane (4). In these iron redox cycling bacteria, PcoB usually have 10-14 transmembrane motifs (**Figure 5b**), probably forming a small porin. Interestingly, one of the most highly expressed genes in *T. denitrificans* when Fe(II) was used as the electron donor for nitrate reduction encodes a hypothetical protein (locus tag Tbd\_1320), which is upstream of *pcoAB* (Tbd\_1324, Tbd\_1325), and the authors attributed this to stress response and metal efflux (11), yet the culture medium did not seem to impose copper stress on this bacterium. This might lend some support for a potential role of PcoAB in Fe(II) oxidation. Taken together, we hypothesize that, in addition to conferring copper resistance as its previously identified role, PcoAB might form a porin-MCO system, in which PcoA oxidizes Fe(II). However, it is not clear whether PcoA is imbedded into PcoB to oxidize Fe(II) at the cell surface, or Fe(II) is oxidized in the periplasm by PcoA and exported through the pore formed by PcoB.

### **Supplementary Text 5. Additional discussion on the lack of NO and N<sub>2</sub>O reductase genes in *Gallionellaceae* sp. genome**

An alternative way to detoxify NO can be through a novel nitric oxide dismutase (NOD). Previously, a NOD was postulated for “*Candidatus* Mehyломicralillis oxyferea” as suggested by the observation that <sup>18</sup>O-labeled O<sub>2</sub> was formed when <sup>18</sup>O-labeled nitrite was added to this nitrite-dependent methane oxidation bacterium (12), and a candidate gene for such a dismutase was further proposed (13). If such an enzyme exists in *Gallionellaceae* sp., not only can it provide a means for NO detoxification, but also generate oxygen to serve as an alternative electron acceptor for biological Fe(II) oxidation (**Figure S6**), which can generate more PMF than denitrification (14) and thus increase energy capturing in NDFO. However, we did not find a homolog of “*Cand. M. oxyferea*” NOD in *Gallionellaceae* sp., but we cannot completely exclude the possibility of such a novel enzyme in *Gallionellaceae* sp. based on genome information alone.

#### **Supplementary Text 6. Replacing of *b*-type cytochrome with heme-binding porin in the Group I hydrogenase gene cluster**

In many bacteria (probably including *Rhizobium* sp. in Culture KS), the Group 1 [NiFe]-hydrogenase gene in the *hya* (or *hyd*, *hup*, *hox*) operon is often upstream of *hyaC* (or *hydC*, *hupC*, *hoxZ*), which encodes a *b*-type cytochrome subunit, and is necessary for transferring electrons from H<sub>2</sub> to the quinone pool and also for anchoring the membrane-bound hydrogenase complex to the periplasmic side of the inner membrane (15-18) (**Figure S8b**). However, the gene encoding this *b*-type cytochrome subunit is missing in *Gallionellaceae* sp., and is replaced with a gene encoding a beta barrel outer membrane protein with six PKD domains and 27 transmembrane motifs, likely forming a porin (**Figure S8a**). To the best of our knowledge, the insertion of such an outer membrane protein into the hydrogenase operon had not been reported. We temperately refer to this outer membrane protein as “HyaX”, since its function is unknown. Interestingly, HyaX also contains one heme-binding motif, a signature of *c*-type cytochrome, which is intriguing given the expected EET feature of *Gallionellaceae* sp. BLASTP search against the NCBI nr database indicates that HyaX is about 30% identical to a number of cell surface proteins, which are often involved in binding extracellular carbohydrate polymer substrates. However these proteins don’t share any homology with HyaX in the first ~100 amino acid region at the N-terminal region of HyaX, and they lack the heme-binding site, suggesting

the novelty of HyaX. It is not clear whether the replacement of the inner membrane *b*-type cytochrome with this outer membrane heme-binding HyaX can change the cellular location where the hydrogenase is attached from inner to outer membrane, which, if true, may alter the electron flow from between periplasm and inner membrane to between periplasm and outer membrane (as indicated in **Figure S8**). If HyaX does function as an outer membrane electron carrier and anchor, *Gallionellaceae* sp. Group 1 [NiFe]-hydrogenase may be able to transfer electrons from periplasmic H<sub>2</sub> to an extracellular electron acceptor (**Figure S8a**). However, preliminary experiments showed that Culture KS was not able to use H<sub>2</sub> to reduce ferrihydrite (unpublished data). Therefore, the function of HyaX and its implication in hydrogen metabolism remains to be elucidated.

#### **Supplementary Text 7. Sulfur and phosphorus metabolisms**

All genomes harbor genes for sulfate transporters and assimilatory sulfate reduction, yet only ES-1 has the genetic potential for dissimilatory sulfate reduction. Previously, Emerson and coworkers reported that sulfur oxidation (*sox*) genes were present in ES-1 but absent in ES-2, and they demonstrated that ES-1 was able to grow on thiosulfate (19). Similar to ES-2, *Gallionellaceae* sp. lacks *sox* genes, and thus cannot use reduced sulfur compounds as electron donors. However, *sox* genes are present in *Bradyrhizobium* sp., *Comamonadaceae* sp. and *Rhizobium* sp.

All genomes have high-affinity phosphate transporters, and some also contain low-affinity transporters. Most genomes possess polyphosphate kinase (PPK) and polyphosphatase (PPX) in polyphosphate accumulation and degradation.

#### **Supplementary Text 8. Strategies to avoid encrustation**

Neutrophilic Fe(II)-oxidizers often form distinctive extracellular structures such as stalks and sheaths to avoid cell encrustation with iron minerals. Previous genomic analyses revealed that ES-1 and ES-2 have the genetic machinery to produce extracellular polysaccharide substances (EPS), which was postulated to be a way to prevent encrustation (19). Clusters of genes encoding for EPS biosynthesis were identified in the *Gallionellaceae* sp. genome, probably serving a

similar role. Indeed, neither stalk nor cell encrustation was observed for Culture KS organisms under the microscope; cells largely remained free of Fe(III) minerals, and minerals only loosely associated with cell surface, indicating that Fe(III) minerals precipitated at a certain distance from the cell surface (20). Several mechanisms were proposed, including acidic pH in the microenvironment in the cell vicinity that allows the Fe(III) remain in solution; organics complexing with Fe(III) to increase its solubility; and cell surface modification to be positively charged to repel Fe(III) ions from the cell surface (20). Interestingly, a very large protein with 3596 amino acids was predicted to be an extracellular protein, annotated as “RTX toxins and related  $\text{Ca}^{2+}$ -binding protein”, with a total of 44  $\text{Ca}^{2+}$ -binding repeats. Previously, such RTX toxins and related  $\text{Ca}^{2+}$ -binding proteins were speculated to be part of bacterial EPS in a wastewater treatment bioreactor, given the affinity of EPS for cations (21). If this is also the case in *Gallionellaceae* sp., it is plausible that the binding of  $\text{Ca}^{2+}$  onto the EPS would make the cell surface more positively charged and therefore repel the Fe(III) ions from the immediate proximity of the cell membrane.

### **Supplementary Text 9. Environmental sensing and motility**

Due to the kinetic favorability of abiotic Fe(II) oxidation by oxygen under neutral pH, neutrophilic biotic Fe(II) oxidation is expected to occur at microoxic or anoxic conditions where FeOB can compete with the rate of abiotic oxidation. Therefore, sensing oxygen concentration and locating themselves at a favorable biogeochemical gradient is critical for FeOB. Similar to ES-1 and ES-2, *Gallionellaceae* sp. possess a complete gene set for flagellar assembly, as well as 10 hemerythrin-like proteins, which may be involved in oxygen sensing in the environment (19), probably also be involved in NO sensing, as hemerythrins also form stable NO complexes HrNO. Like ES-1 and ES-2, *Gallionellaceae* sp. has an overrepresentation of genes encoding chemotaxis and signal transduction in its genome, suggesting an active life style adapted to moving towards a favorable biogeochemical gradient. For example, *Gallionellaceae* sp. genome contains NarXL, which is upstream of nitrate transporter and nitrate reductase (Nar) gene cluster. There is no NarX-Tar hybrid for chemotaxis to nitrate and nitrite (22). However, *Gallionellaceae* sp. has at least seven copies of nitrate- and nitrate sensing domain (NIT, pfam08376). It was proposed that NIT-containing receptors regulate gene expression and cell motility in response to



nitrate and/or nitrite (23). In *Gallionellaceae* sp., two methyl-accepting chemotaxis proteins (MCPs) contain a NIT domain in the N-terminal region, and three NIT-containing genes are next to MCP coding genes. Therefore, it is likely that these NIT-associated MCPs are involved in chemotaxis in response to nitrate and/or nitrite. These genes may facilitate *Gallionellaceae* sp. to move towards its favorable redox gradient in the sediment core.

## SUPPLEMENTARY REFERENCES

1. **Qin QL, Xie BB, Zhang XY, Chen XL, Zhou BC, Zhou J, Oren A, Zhang YZ.** 2014. A proposed genus boundary for the prokaryotes based on genomic insights. *J Bacteriol* **196**:2210-2215.
2. **Soldatova A, Butterfield C, Oyerinde O, Tebo B, Spiro T.** 2012. Multicopper oxidase involvement in both Mn(II) and Mn(III) oxidation during bacterial formation of MnO<sub>2</sub>. *JBIC Journal of Biological Inorganic Chemistry* **17**:1151-1158.
3. **Mehta T, Childers SE, Glaven R, Lovley DR, Mester T.** 2006. A putative multicopper protein secreted by an atypical type II secretion system involved in the reduction of insoluble electron acceptors in *Geobacter sulfurreducens*. *Microbiology* **152**:2257-2264.
4. **Chaturvedi KS, Henderson JP.** 2014. Pathogenic adaptations to host-derived antibacterial copper. *Frontiers in Cellular and Infection Microbiology* **4**:3.
5. **Benzine J, Shelobolina E, Xiong MY, Kennedy DW, McKinley JP, Lin X, Roden EE.** 2013. Fe-phyllsilicate redox cycling organisms from a redox transition zone in Hanford 300 Area sediments. *Frontiers in Microbiology* **4**:388.
6. **Lee BTO, Brown NL, Rogers S, Bergemann A, Camakarlis J, Rouch DA.** 1990. Bacterial Response to Copper in the Environment: Copper Resistance in *Escherichia coli* as a Model System, p 625-632. *In* Broekaert JAC, Güçer Ş, Adams F (ed), *Metal Speciation in the Environment*, vol 23. Springer Berlin Heidelberg.
7. **Cha JS, Cooksey DA.** 1991. Copper resistance in *Pseudomonas syringae* mediated by periplasmic and outer membrane proteins. *Proc Natl Acad Sci U S A* **88**:8915-8919.
8. **Mellano MA, Cooksey DA.** 1988. Nucleotide sequence and organization of copper resistance genes from *Pseudomonas syringae* pv. tomato. *J Bacteriol* **170**:2879-2883.
9. **Rensing C, Grass G.** 2003. *Escherichia coli* mechanisms of copper homeostasis in a changing environment. *FEMS Microbiol Rev* **27**:197-213.
10. **Huston WM, Jennings MP, McEwan AG.** 2002. The multicopper oxidase of *Pseudomonas aeruginosa* is a ferroxidase with a central role in iron acquisition. *Mol Microbiol* **45**:1741-1750.
11. **Beller HR, Zhou P, Legler TC, Chakicherla A, Kane S, Letain TE, P AOD.** 2013. Genome-enabled studies of anaerobic, nitrate-dependent iron oxidation in the chemolithoautotrophic bacterium *Thiobacillus denitrificans*. *Front Microbiol* **4**:249.
12. **Ettwig KF, Butler MK, Le Paslier D, Pelletier E, Mangenot S, Kuypers MM, Schreiber F, Dutilh BE, Zedelius J, de Beer D, Gloerich J, Wessels HJ, van Alen T, Luesken F, Wu ML, van de Pas-Schoonen KT, Op den Camp HJ, Janssen-Megens EM, Francoijs KJ, Stunnenberg H, Weissenbach J, Jetten MS, Strous M.** 2010. Nitrite-driven anaerobic methane oxidation by oxygenic bacteria. *Nature* **464**:543-548.
13. **Ettwig KF, Speth DR, Reimann J, Wu ML, Jetten MSM, Keltjens JT.** 2012. Bacterial oxygen production in the dark. *Frontiers in Microbiology* **3**:273.
14. **Chen J, Strous M.** 2013. Denitrification and aerobic respiration, hybrid electron transport chains and co-evolution. *Biochim Biophys Acta* **1827**:136-144.

15. **Bernhard M, Benelli B, Hochkoeppler A, Zannoni D, Friedrich B.** 1997. Functional and structural role of the cytochrome b subunit of the membrane-bound hydrogenase complex of *Alcaligenes eutrophus* H16. *Eur J Biochem* **248**:179-186.
16. **Gross R, Pisa R, Sanger M, Lancaster CR, Simon J.** 2004. Characterization of the menaquinone reduction site in the diheme cytochrome b membrane anchor of *Wolinella succinogenes* NiFe-hydrogenase. *J Biol Chem* **279**:274-281.
17. **Meek L, Arp DJ.** 2000. The hydrogenase cytochrome b heme ligands of *Azotobacter vinelandii* are required for full H<sub>2</sub> oxidation capability. *J Bacteriol* **182**:3429-3436.
18. **Palagyi-Meszaros LS, Maroti J, Latinovics D, Balogh T, Klement E, Medzihradzsky KF, Rakhely G, Kovacs KL.** 2009. Electron-transfer subunits of the NiFe hydrogenases in *Thiocapsa roseopersicina* BBS. *FEBS J* **276**:164-174.
19. **Emerson D, Field EK, Chertkov O, Davenport KW, Goodwin L, Munk C, Nolan M, Woyke T.** 2013. Comparative genomics of freshwater Fe-oxidizing bacteria: implications for physiology, ecology, and systematics. *Front Microbiol* **4**:254.
20. **Schädler S, Burkhardt C, Hegler F, Straub K, Miot J, Benzerara K, Kappler A.** 2009. Formation of cell-iron-mineral aggregates by phototrophic and nitrate-reducing anaerobic Fe (II)-oxidizing bacteria. *Geomicrobiology Journal* **26**:93-103.
21. **Garcia Martin H, Ivanova N, Kunin V, Warnecke F, Barry KW, McHardy AC, Yeates C, He S, Salamov AA, Szeto E, Dalin E, Putnam NH, Shapiro HJ, Pangilinan JL, Rigoutsos I, Kyrpides NC, Blackall LL, McMahon KD, Hugenholtz P.** 2006. Metagenomic analysis of two enhanced biological phosphorus removal (EBPR) sludge communities. *Nat Biotechnol* **24**:1263-1269.
22. **Ward SM, Delgado A, Gunsalus RP, Manson MD.** 2002. A NarX-Tar chimera mediates repellent chemotaxis to nitrate and nitrite. *Mol Microbiol* **44**:709-719.
23. **Shu CJ, Ulrich LE, Zhulin IB.** 2003. The NIT domain: a predicted nitrate-responsive module in bacterial sensory receptors. *Trends in Biochemical Sciences* **28**:121-124.

## SUPPLEMENTARY FIGURE LEGENDS

**Figure S1.** Taxonomic assignment of essential single-copy genes in metagenomes KS-Mad (a) and KS-Tueb (b) by MEGAN. The number next to the taxon at each node indicates the number of genes assigned to that taxon based on the lowest common ancestor algorithm. For the leaf nodes, this number is also reflected by the size of the circle. The bar with a number next to each leaf node taxon indicate the average fold coverage of contigs which contain genes assigned to that leaf node. Based on the expected numbers of essential single-copy genes for complete genomes (105-106) and the fold coverage pattern of these leaf nodes, essential single-copy genes were assigned to bins indicated by different colors, and these bins were assigned to the level of Family or Genus, with the Family or Genus name labeled with bold blue fonts.

**Figure S2.** Binning results of KS-Mad metagenome, with contigs and sequence fragments from different populations indicated by different colors. Contig GC contents and fold coverage (indicative of organism abundance in the community) are shown in (a), with each point representing a contig, and the point size reflecting the contig length. (b) is the tiled display of an Emergent Self-organizing Map (ESOM) based on the tetranucleotide frequency calculated with a window size of 5 kbp for contigs longer than 3 kbp, with each dot representing a 5-kbp fragment (or a contig if its length is shorter than 5 kbp). An ESOM (as outlined by the white rectangular) is a borderless map, continuous from the top to the bottom and from left to right. The elevations on the map (shown in white and brown) indicate large differences in tetranucleotide frequency, and therefore suggest divisions between taxonomic groups.

**Figure S3.** Phylogenetic tree constructed with conserved phylogenetic marker genes by using the PhyloPhlAn analysis pipeline. Protein sequences from all these genomes were input to PhyloPhlAn for extracting and individually aligning the conserved phylogenetic marker proteins. The alignments were concatenated for phylogenetic tree construction using the FastTree algorithm with default settings.

**Figure S4.** Phylogenetic tree constructed with *Gallionellaceae* sp. and *Rhodanobacter* sp. Cyc2-like proteins (in red) and sequences homologous to them. The Cyc2 protein from *A. ferroxidans* (in blue) and a Cyc2-like protein in *Bradyrhizobium* sp. genome recovered from a pyrite-oxidizing enrichment culture (in green) were also included as references. IMG Gene Object IDs are indicated in the brackets.

**Figure S5.** Other gene clusters encoding porin and periplasmic cytc (a) or porin and periplasmic MCO (b). In (a), a periplasmic cytc/*nirS* is clustered with a porin-coding gene annotated as outer membrane receptor (OMR). In (b), a periplasmic MCO (PcoA) is in the same operon with a porin (PcoB). In addition to bacteria in Culture KS (in blue), we also included a draft genome recovered from a pyrite-oxidizing enrichment culture and genomes of several iron redox cycling bacteria isolated from Hanford subsurface (in black) and publically available genomes (in grey). For each gene cluster, IMG Gene OID for the porin gene is listed in the parenthesis. Porin-coding genes are indicated with green arrows; cytc are indicated with red arrows, and MCO are indicated with brown arrows. The number in the cytc-coding genes indicates the number of heme-binding sites, and the number in the porin-coding genes indicates the number of transmembrane regions. Predicted cellular locations of porin, cytc and MCO are indicated by different line types under the gene: thick solid lines for outer membrane, and dash lines for periplasmic, respectively.

**Figure S6.** A hypothesized electron transfer pathway proposed for NDFO by *Gallionellaceae* sp., if a nitric oxide dismutase (NOD) is present. Electron flows are indicated in yellow arrows, and chemical reduction of NO by Fe(II) is indicated in red arrows. Abbreviations: OM, outer membrane; IM, inner membrane; Nar, dissimilatory nitrate reductase complex; NarK, nitrate:nitrite antiporter; NirS/K: cytochrome *cd*<sub>1</sub>- and copper-type nitrite reductase respectively; *cbb*<sub>3</sub>, *cbb*<sub>3</sub>-type cytochrome *c* oxidase.

**Figure S7.** Phylogenetic tree of the large subunit of ribulose bisphosphate carboxylase (RuBisCO). RuBisCO sequences from the two metagenomes were colored (red: KS-Mad; blue: KS-Tueb), with their putative taxonomy assignments preceding their IMG Object IDs in the brackets.

**Figure S8.** Gene organization and predicted cellular location of the Group I uptake [NiFe]-hydrogenase encoded by the *hya* operon in *Gallionellaceae* sp. (**a**), as compared to the *hya* operon in *E. coli*, the *hyd* operon in *Wolinella succinogenes* and the Group I uptake [NiFe]-hydrogenase in the *Rhizobium* sp. draft genome in this study (**b**). Note that the hydrogenase operon in *Rhizobium* sp. was split into two contigs, which were manually joined in this figure, with a vertical dash line indicating the boundary of the two contigs. The novel porin-like protein (HyaX) in *Gallionellaceae* sp. has a heme-binding site (indicated by the vertical bar on the gene) (**a**), and it replaces *hyaC* in *E. coli*, *hydC* in *W. succinogenes* and *hyaC* in *Rhizobium* sp. (**b**). Electron flows are indicated with yellow arrows, and the generation and consumption of proton motive force are indicated with red and green arrows respectively. In (**a**), it is not clear whether electrons are passed to an extracellular electron acceptor (EEA), which is then transformed from an oxidized form, EEA<sub>(ox)</sub> to a reduced form, EEA<sub>(red)</sub>, and therefore was marked with “???”. Abbreviations: OM, outer membrane; PS, periplasmic space; IM, inner membrane; HoxS, soluble NAD-reducing hydrogenase encoded by the *hoxS* operon.

SUPPLEMENTARY FIGURES

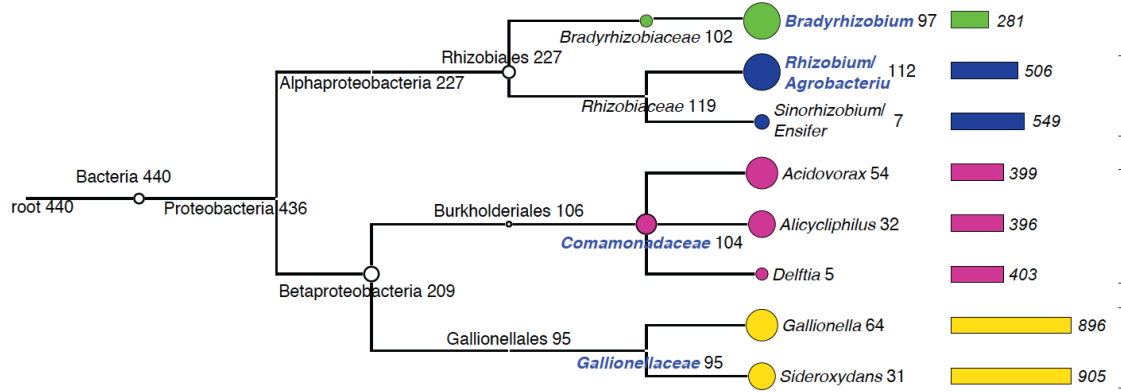

(a)

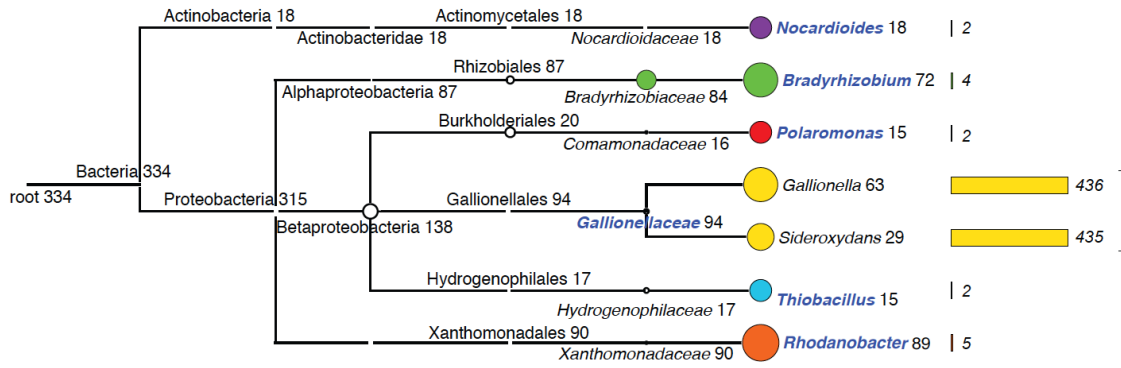

(b)

Figure S1.

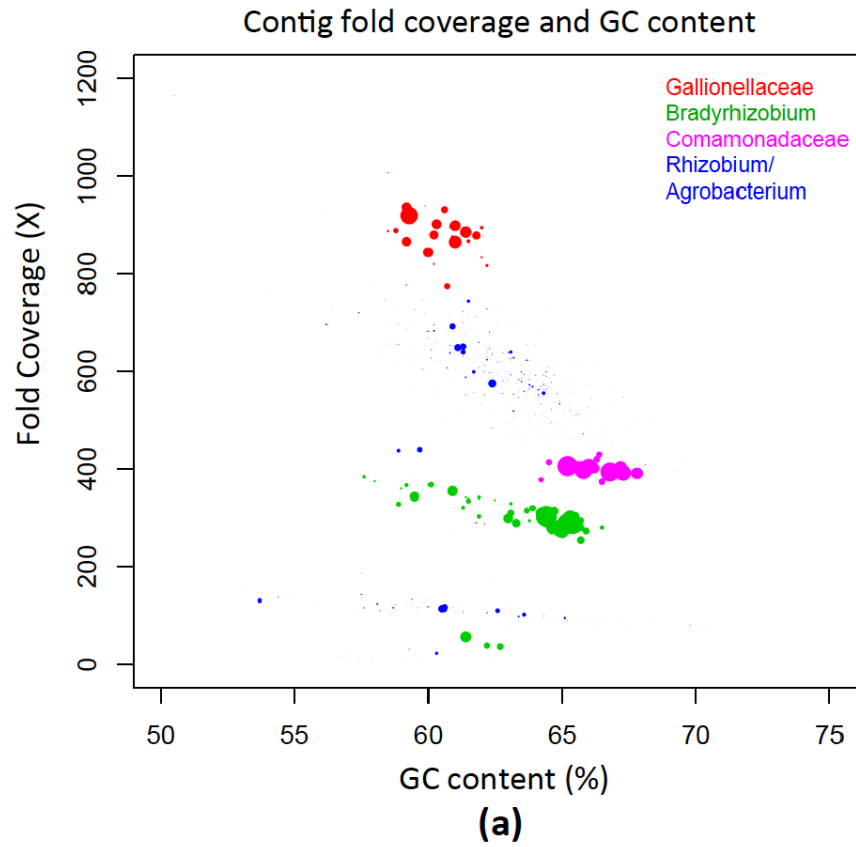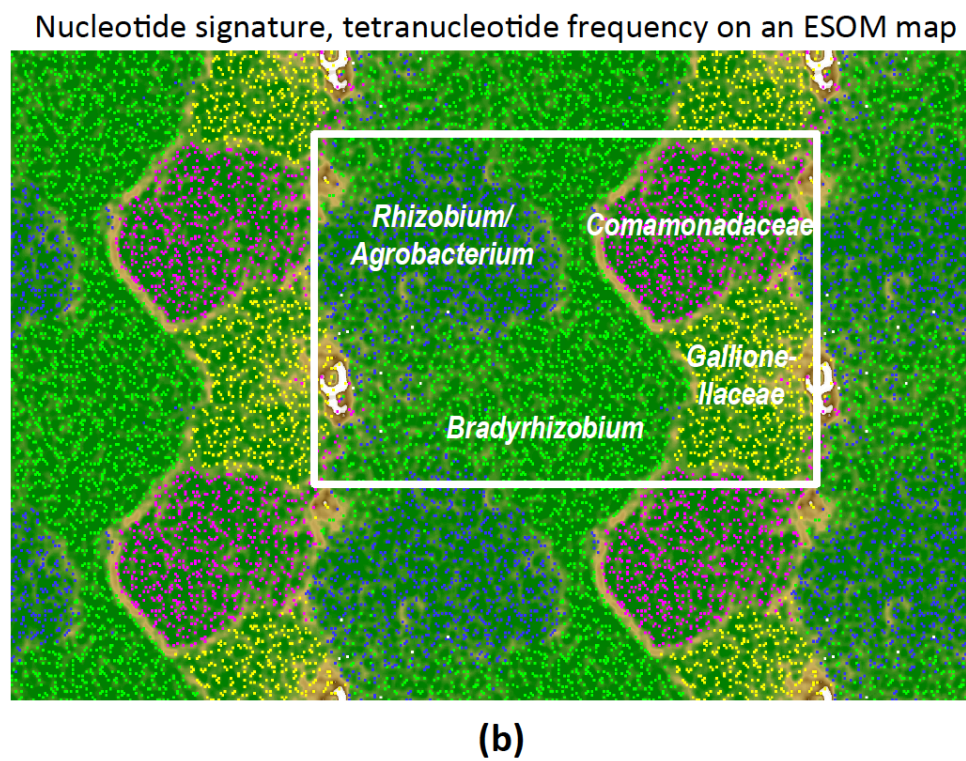

Figure S2.



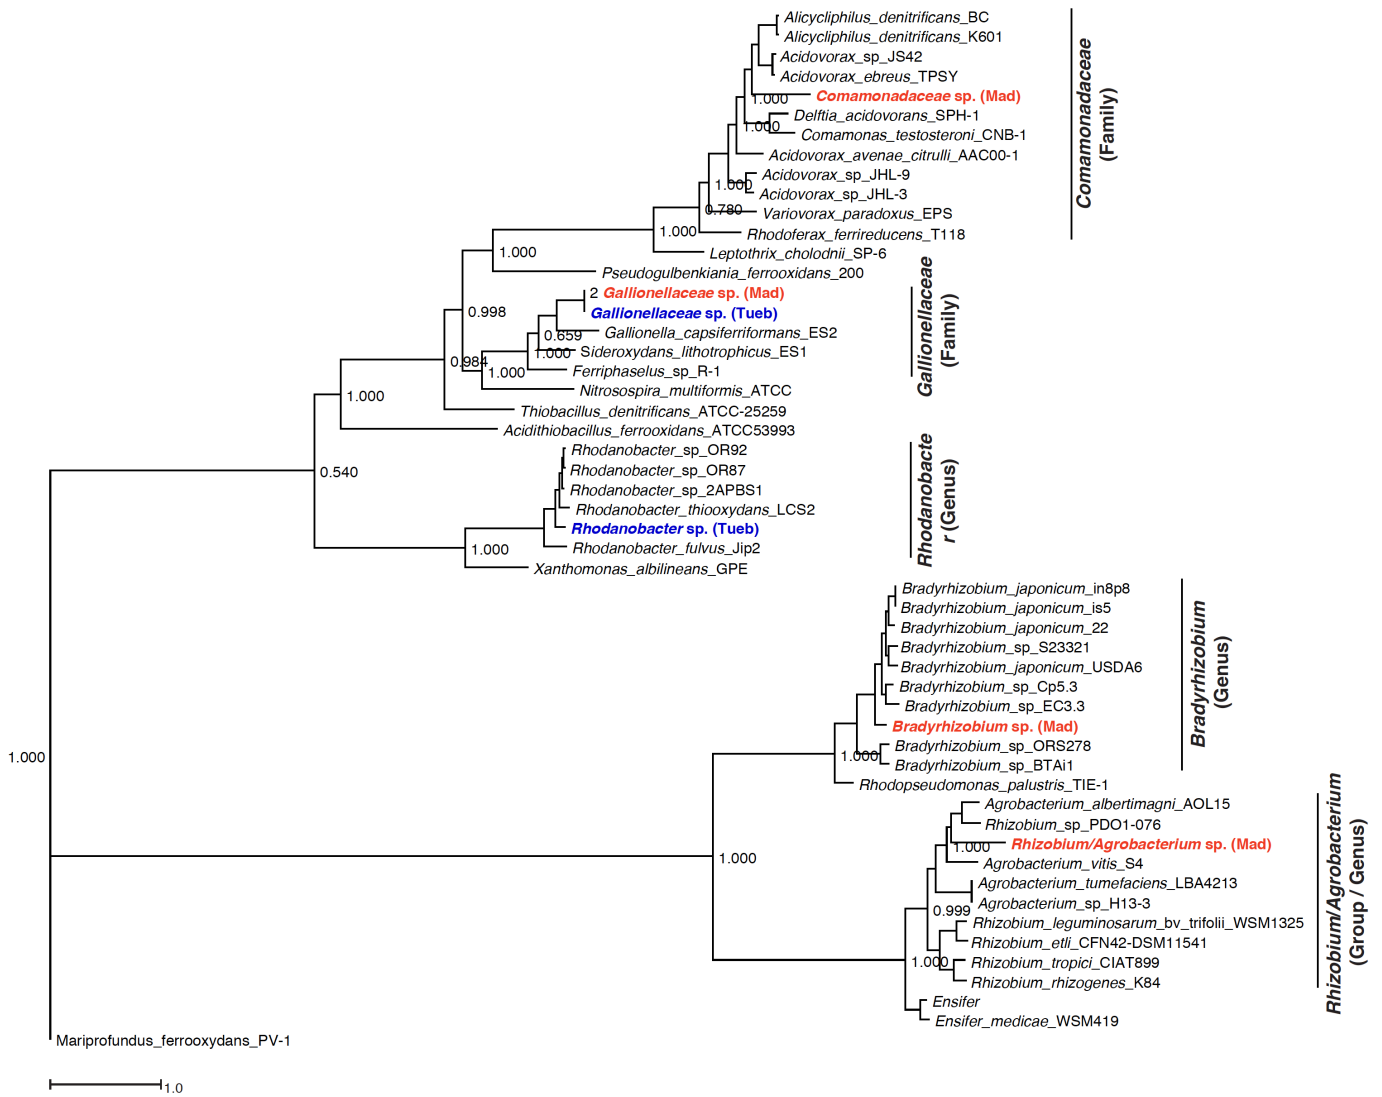

Figure S3.

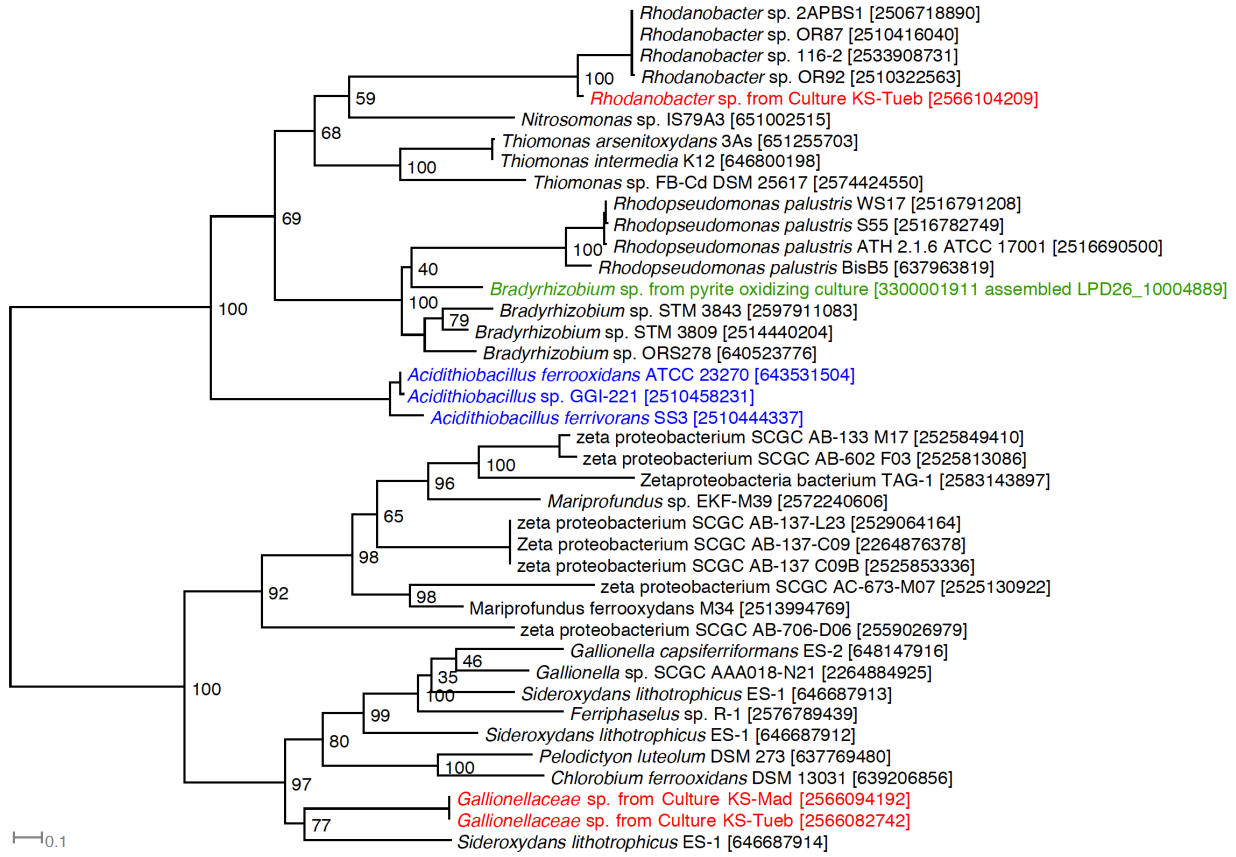

Figure S4.

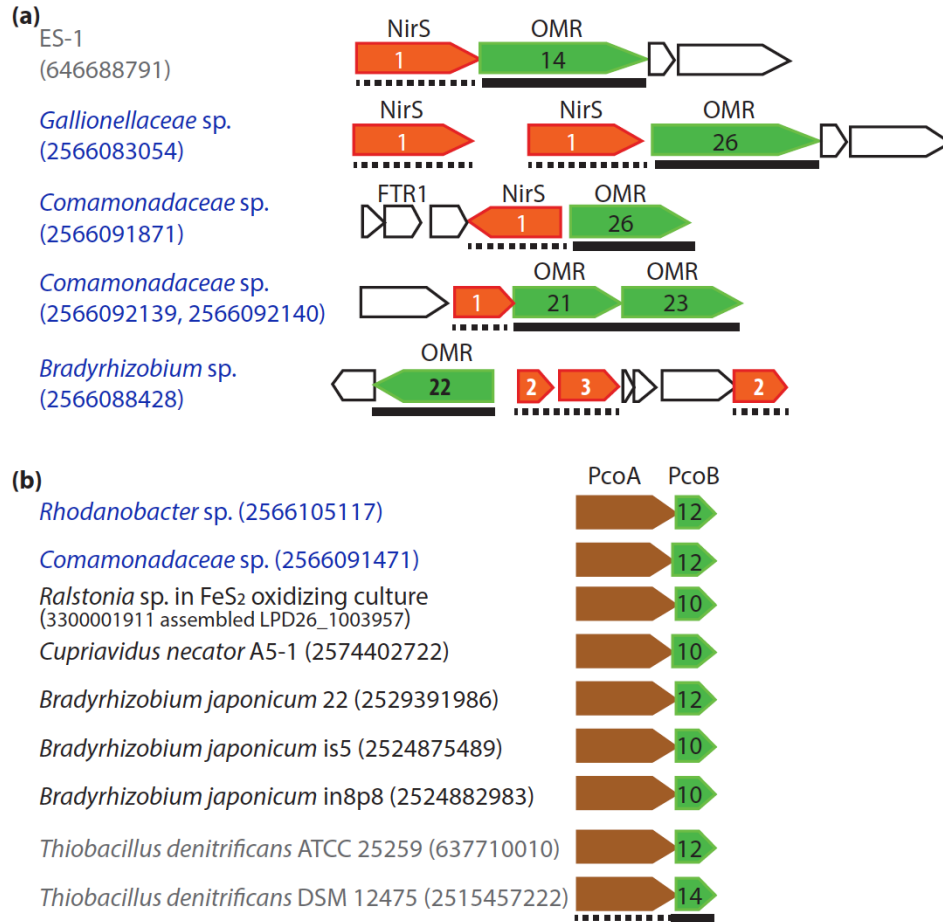

**Figure S5.**

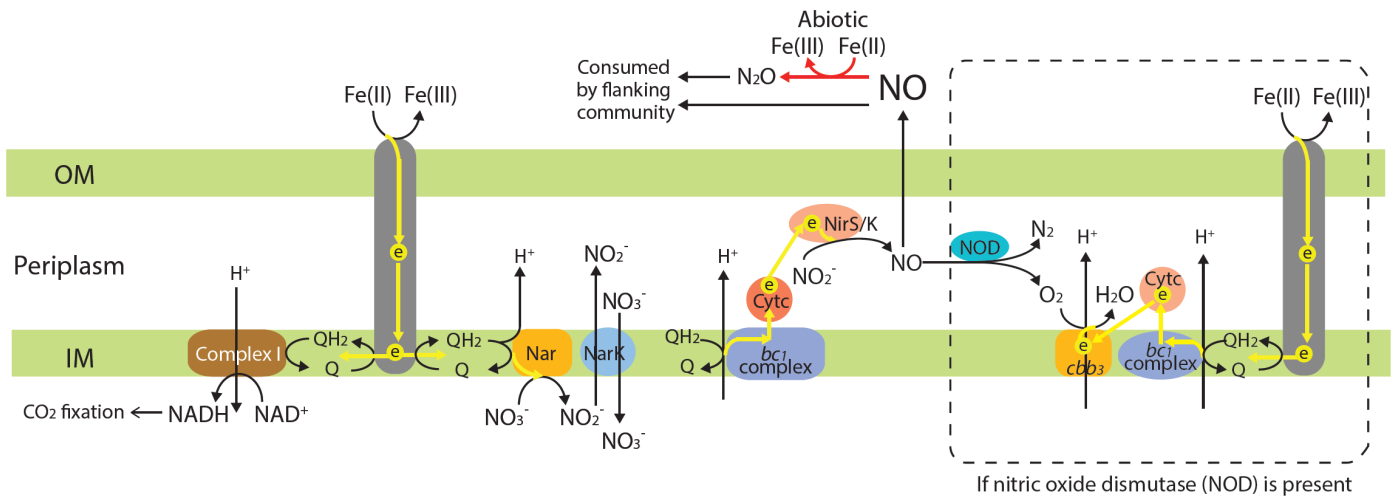

**Figure S6.**

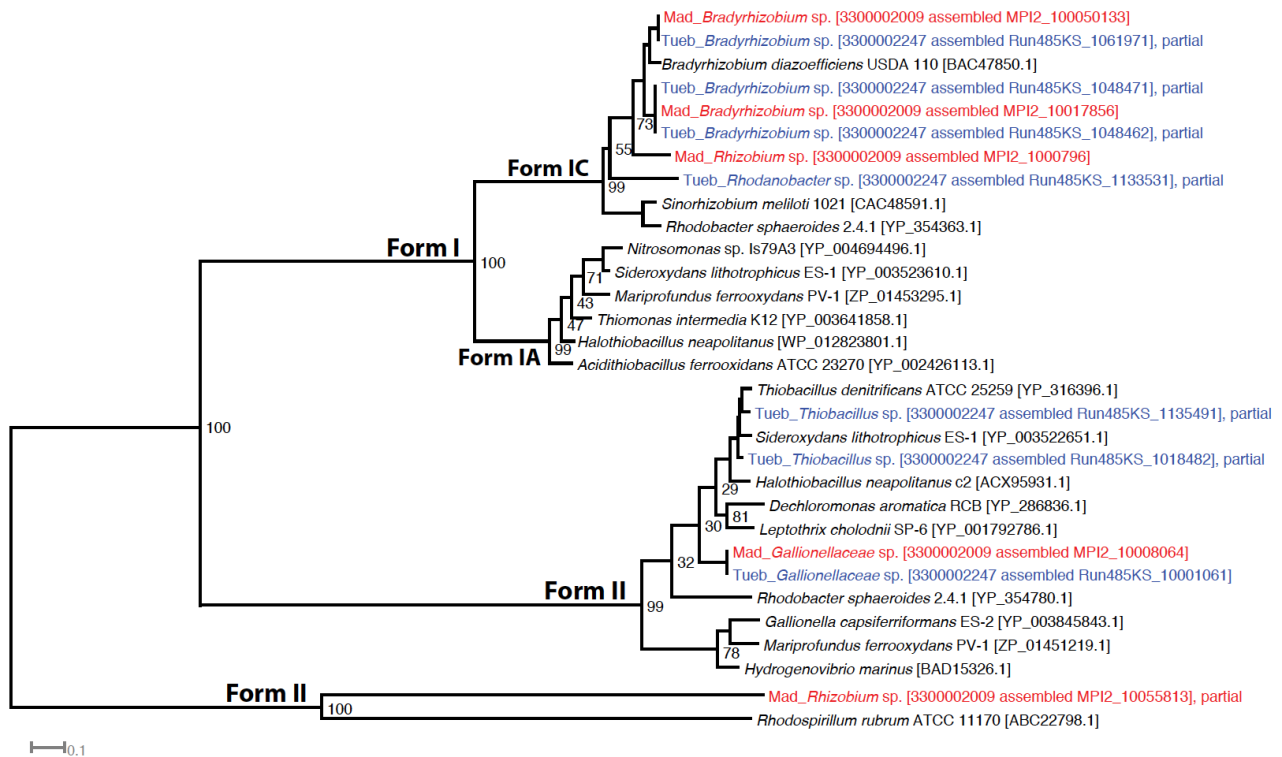

Figure S7.

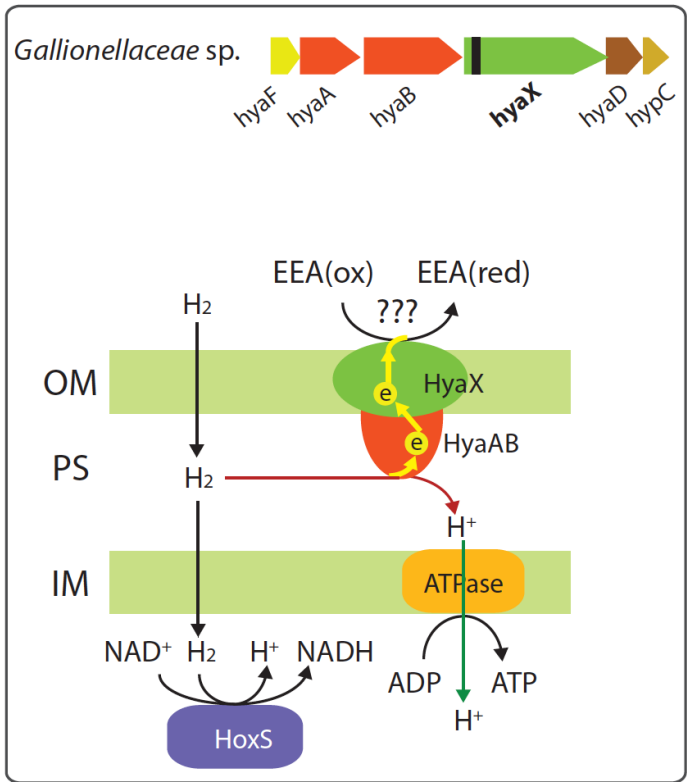

(a)

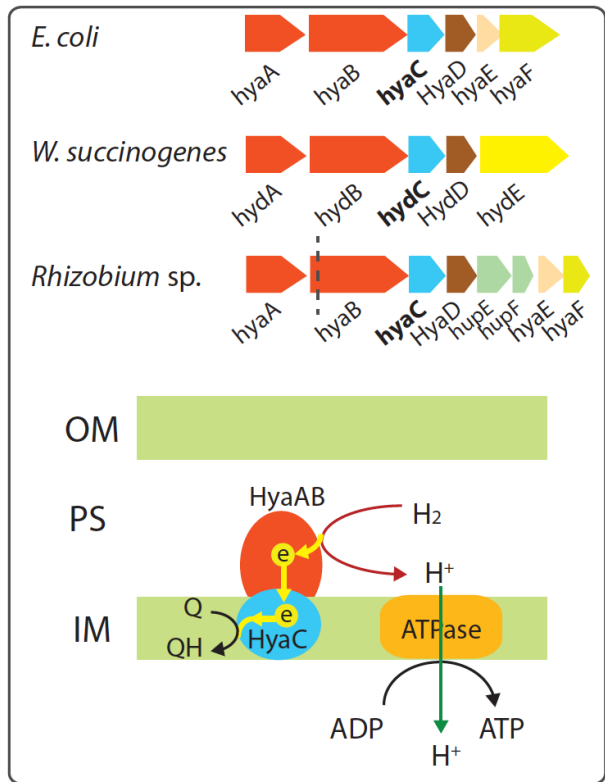

(b)

Figure S8.

## SUPPLEMENTARY TABLES

**Table S1. Metagenome sequencing and assembly statistics**

| <b>Sequencing</b>       | <b>KS-Mad</b> | <b>KS-Tueb</b> |
|-------------------------|---------------|----------------|
| Platform                | HiSeq 2000    | MiSeq          |
| Total No. of reads      | 111,887,076   | 5,915,054      |
| Read length (bp)        | 100           | 250            |
| Total raw sequence (Gb) | 11.3          | 1.5            |
| <b>Assembly</b>         |               |                |
| N75 (bp)                | 7,003         | 682            |
| N50 (bp)                | 90,981        | 1,291          |
| N25 (bp)                | 255,379       | 2,859          |
| Minimum length (bp)     | 198           | 188            |
| Maximum (bp)            | 606,530       | 435,491        |
| Average (bp)            | 3,470         | 1,023          |
| Count                   | 6,238         | 14,698         |
| Total length (bp)       | 21,648,289    | 15,029,786     |

**Table S2. Classification and BLASTN search of 16S rRNA genes in the metagenomes**

| Locus Tag         | Gene length (bp) <sup>a</sup> | Contig length (bp) <sup>b</sup> | Fold coverage (X) <sup>c</sup> | Classification by RDP classifier <sup>d</sup> | Top BLASTN hit to NCBI 16S rRNA database             | Top BLASTN hit to clone libraries by Bloethe and Roden (2009) <sup>e</sup> |
|-------------------|-------------------------------|---------------------------------|--------------------------------|-----------------------------------------------|------------------------------------------------------|----------------------------------------------------------------------------|
| <b>KS-Mad</b>     |                               |                                 |                                |                                               |                                                      |                                                                            |
| MPI2_1002824      | 1420                          | 5046                            | 2515                           | <i>Sideroxydans</i>                           | 96% to ES-1 (94% to ES-2)                            | <b>100% to clone F30F68 (OTU1)</b>                                         |
| MPI2_1004612      | 1366                          | 5950                            | 2981                           | <i>Rhizobium</i>                              | 98% to <i>Rhizobium rosettiformans</i> W3            | 90% to <i>Parvibaculum</i> sp. MBNA2 (OTU3)                                |
| MPI2_1002014      | 1371                          | 29769                           | 580                            | <i>Bradyrhizobium</i>                         | 99% to <i>Bradyrhizobium valentinum</i> LmjM3        | 89% to <i>Parvibaculum</i> sp. MBNA2 (OTU3)                                |
| MPI2_1010605      | 1415                          | 5709                            | 1777                           | <i>Comamonas</i>                              | 97% to <i>Comamonas badia</i> IAM 14839              | 95% to <i>Comamonas</i> sp. MPI12 (OTU2)                                   |
| MPI2_1060162      | 146                           | 260                             | 6                              | <i>Nocardioides</i>                           | 100% to <i>Nocardioides</i> sp. JS614 JS614          | 93% to <i>Rhodanobacter</i> sp. MBNA3 (OTU4)                               |
| MPI2_1059442      | 89                            | 271                             | 4                              | <i>Alphaproteobacteria</i>                    | 97% to <i>Nordella oligomobilis</i> N21              | No hit                                                                     |
| <b>KS-Tueb</b>    |                               |                                 |                                |                                               |                                                      |                                                                            |
| Run485KS_1000224  | 1420                          | 63602                           | 650                            | <i>Sideroxydans</i>                           | 96% to ES-1 (94% to ES-2)                            | <b>100% to clone F30F68 (OTU1)</b>                                         |
| Run485KS_10002928 | 1081                          | 25511                           | 399                            | <i>Sideroxydans</i>                           | 95% to ES-1 (94% to ES-2)                            | <b>100% to clone F29F67 (OTU1)</b>                                         |
| Run485KS_1009693  | 1427                          | 3882                            | 6                              | <i>Rhodanobacter</i>                          | 99% to <i>Rhodanobacter denitrificans</i> 2APBS1     | <b>100% to Rhodanobacter sp. MBNA3 (OTU4)</b>                              |
| Run485KS_1083141  | 336                           | 1644                            | 5                              | <i>Bradyrhizobium</i>                         | 100% to <i>Bradyrhizobium liaoningense</i> 2281      | 89% to <i>Parvibaculum</i> sp. MBNA2 (OTU3)                                |
| Run485KS_1118871  | 744                           | 744                             | 4                              | <i>Bradyrhizobium</i>                         | 99% to <i>Bradyrhizobium valentinum</i> LmjM3        | 89% to <i>Parvibaculum</i> sp. MBNA2 (OTU3)                                |
| Run485KS_1098953  | 366                           | 981                             | 2                              | <i>Bradyrhizobiaceae</i>                      | 97% to <i>Bradyrhizobium iriomotense</i> NBRC 102520 | 88% to <i>Rhodanobacter</i> sp. MBNA3 (OTU4)                               |
| Run485KS_1046253  | 372                           | 2042                            | 5                              | <i>Polaromonas</i>                            | 99% to <i>Polaromonas</i> sp. JS666 JS666            | 90% to clone F32F70 (OTU1)                                                 |
| Run485KS_1124581  | 269                           | 269                             | 1                              | <i>Polaromonas</i>                            | 100% to <i>Polaromonas</i> sp. JS666 JS666           | 95% to <i>Comamonas</i> sp. MPI12 (OTU2)                                   |
| Run485KS_1118021  | 374                           | 443                             | 6                              | <i>Comamonadaceae</i>                         | 99% to <i>Rhodoferrax fermentans</i> FR2             | 90% to clone F33F71 (OTU1)                                                 |
| Run485KS_1095781  | 479                           | 480                             | 3                              | <i>Thiobacillus</i>                           | 98% to <i>Thiobacillus thioparus</i> THI 111         | 88% to clone F33F71 (OTU1)                                                 |
| Run485KS_1123062  | 113                           | 692                             | 2                              | <i>Thiobacillus</i>                           | 98% to <i>Thiobacillus thiophilus</i> D24TN          | 92% to clone F33F71 (OTU1)                                                 |
| Run485KS_1142341  | 468                           | 468                             | 2                              | <i>Nocardioides</i>                           | 99% to <i>Nocardioides</i> sp. JS614 JS614           | 83% to <i>Parvibaculum</i> sp. MBNA2 (OTU3)                                |
| Run485KS_1142311  | 128                           | 584                             | 3                              | <i>Nocardioides</i>                           | 98% to <i>Nocardioides</i> sp. JS614 JS614           | No hit                                                                     |
| Run485KS_1083691  | 250                           | 250                             | 1                              | <i>Betaproteobacteria</i>                     | 96% to <i>Propionivibrio dicarboxylicus</i> CreMal1  | <b>99% to clone F33F71 (OTU1)</b>                                          |

<sup>a</sup>The length of the recovered 16S rRNA genes/fragments

<sup>b</sup>The length of the 16S-rRNA gene containing contig

<sup>c</sup>Fold coverage of the 16S rRNA genes/fragments. This number is higher than the average contig fold coverage within the draft genome, due to multiple copies of *rrn* operon in the genome.

<sup>d</sup>Classification of 16S rRNA genes/fragments by the Ribosomal Database Project (RDP; <http://rdp.cme.msu.edu/>) classifier with a confidence level of 80%.

<sup>e</sup>Blothe M, Roden EE. 2009. Composition and activity of an autotrophic Fe(II)-oxidizing, nitrate-reducing enrichment culture. *Appl Environ Microbiol* 75:6937-6940.



**Table S3. Counts of amino acid and carbohydrate transporters.**

| COG                            | COG Functions                                                                         | ES-1      | ES-2      | Gallionellaceae (Tueb) | Gallionellaceae (Mad) | Bradyrhizobium | Comamonadaceae | Rhizobium  | Rhodanobacter |
|--------------------------------|---------------------------------------------------------------------------------------|-----------|-----------|------------------------|-----------------------|----------------|----------------|------------|---------------|
| <b>Amino Acid transporters</b> |                                                                                       |           |           |                        |                       |                |                |            |               |
| COG0765                        | ABC-type amino acid transport system, permease component                              | 0         | 0         | 0                      | 0                     | 4              | 7              | 10         | 0             |
| COG4597                        | ABC-type amino acid transport system, permease component                              | 0         | 0         | 0                      | 0                     | 2              | 0              | 2          | 0             |
| COG0410                        | ABC-type branched-chain amino acid transport system, ATPase component                 | 2         | 1         | 0                      | 0                     | 33             | 18             | 7          | 0             |
| COG0411                        | ABC-type branched-chain amino acid transport system, ATPase component                 | 1         | 1         | 0                      | 0                     | 33             | 17             | 2          | 0             |
| COG0683                        | ABC-type branched-chain amino acid transport system, periplasmic component            | 2         | 2         | 1                      | 1                     | 64             | 22             | 8          | 0             |
| COG4177                        | ABC-type branched-chain amino acid transport system, permease component               | 1         | 1         | 0                      | 0                     | 27             | 15             | 6          | 0             |
| COG3842                        | ABC-type Fe <sup>3+</sup> /spermidine/putrescine transport systems, ATPase components | 1         | 0         | 1                      | 1                     | 2              | 1              | 11         | 0             |
| COG1135                        | ABC-type methionine transport system, ATPase component                                | 0         | 0         | 0                      | 0                     | 0              | 1              | 0          | 0             |
| COG2011                        | ABC-type methionine transport system, permease component                              | 0         | 0         | 0                      | 0                     | 0              | 1              | 0          | 1             |
| COG4608                        | ABC-type oligopeptide transport system, ATPase component                              | 0         | 0         | 0                      | 0                     | 3              | 1              | 1          | 0             |
| COG4166                        | ABC-type oligopeptide transport system, periplasmic component                         | 0         | 1         | 1                      | 1                     | 3              | 1              | 2          | 0             |
| COG1126                        | ABC-type polar amino acid transport system, ATPase component                          | 0         | 0         | 0                      | 0                     | 3              | 4              | 7          | 0             |
| COG4175                        | ABC-type proline/glycine betaine transport system, ATPase component                   | 0         | 0         | 0                      | 0                     | 0              | 1              | 5          | 0             |
| COG1125                        | ABC-type proline/glycine betaine transport system, ATPase component                   | 0         | 0         | 0                      | 0                     | 1              | 0              | 0          | 0             |
| COG2113                        | ABC-type proline/glycine betaine transport system, periplasmic component              | 0         | 0         | 0                      | 0                     | 0              | 1              | 2          | 0             |
| COG4176                        | ABC-type proline/glycine betaine transport system, permease component                 | 0         | 0         | 0                      | 0                     | 0              | 1              | 2          | 0             |
| COG1174                        | ABC-type proline/glycine betaine transport system, permease component                 | 0         | 0         | 0                      | 0                     | 0              | 0              | 0          | 1             |
| COG1176                        | ABC-type spermidine/putrescine transport system, permease component I                 | 1         | 0         | 1                      | 1                     | 1              | 0              | 7          | 0             |
| COG1177                        | ABC-type spermidine/putrescine transport system, permease component II                | 1         | 0         | 1                      | 1                     | 2              | 0              | 7          | 0             |
| COG0747                        | ABC-type transport system, periplasmic component                                      | 0         | 0         | 0                      | 0                     | 6              | 2              | 9          | 0             |
| COG0833                        | Amino acid permease                                                                   | 0         | 0         | 0                      | 0                     | 0              | 0              | 1          | 0             |
| COG0531                        | Amino acid transporter                                                                | 0         | 0         | 1                      | 1                     | 1              | 0              | 2          | 5             |
| COG1279                        | Arginine exporter protein ArgO                                                        | 0         | 0         | 0                      | 0                     | 0              | 0              | 1          | 0             |
| COG0559                        | Branched-chain amino acid ABC-type transport system, permease component               | 2         | 1         | 0                      | 0                     | 35             | 18             | 9          | 0             |
| COG3104                        | Dipeptide/tripeptide permease                                                         | 0         | 0         | 0                      | 0                     | 0              | 0              | 0          | 4             |
| COG1115                        | Na <sup>+</sup> /alanine symporter                                                    | 0         | 0         | 0                      | 0                     | 0              | 0              | 1          | 0             |
| COG0591                        | Na <sup>+</sup> /proline symporter                                                    | 1         | 1         | 1                      | 1                     | 1              | 1              | 1          | 0             |
| COG1296                        | Predicted branched-chain amino acid permease (azaleucine resistance)                  | 0         | 0         | 0                      | 0                     | 1              | 2              | 1          | 0             |
| COG2095                        | Small neutral amino acid transporter SnaA, MarC family                                | 1         | 0         | 1                      | 1                     | 1              | 2              | 1          | 1             |
| COG0687                        | Spermidine/putrescine-binding periplasmic protein                                     | 2         | 0         | 1                      | 1                     | 1              | 0              | 10         | 0             |
| COG5006                        | Threonine/homoserine efflux transporter RhtA                                          | 3         | 1         | 2                      | 2                     | 0              | 5              | 0          | 1             |
| COG1280                        | Threonine/homoserine/homoserine lactone efflux protein                                | 0         | 0         | 0                      | 0                     | 5              | 3              | 10         | 0             |
| COG0444                        | ABC-type dipeptide/oligopeptide/nickel transport system, ATPase component             | 0         | 1         | 1                      | 1                     | 4              | 1              | 1          | 0             |
| COG0601                        | ABC-type dipeptide/oligopeptide/nickel transport system, permease component           | 1         | 1         | 1                      | 1                     | 6              | 1              | 12         | 0             |
| COG1173                        | ABC-type dipeptide/oligopeptide/nickel transport system, permease component           | 1         | 1         | 1                      | 1                     | 6              | 1              | 11         | 0             |
| COG0834                        | ABC-type amino acid transport/signal transduction system, periplasmic component       | 1         | 1         | 0                      | 0                     | 8              | 5              | 11         | 0             |
|                                | <b>Sum</b>                                                                            | <b>22</b> | <b>15</b> | <b>17</b>              | <b>18</b>             | <b>258</b>     | <b>138</b>     | <b>167</b> | <b>21</b>     |

**Carbohydrate transporters**

|            |                                                                                                   |           |           |          |          |            |           |            |           |
|------------|---------------------------------------------------------------------------------------------------|-----------|-----------|----------|----------|------------|-----------|------------|-----------|
| COG1653    | ABC-type glycerol-3-phosphate transport system, periplasmic component                             | 0         | 0         | 0        | 0        | 8          | 3         | 17         | 0         |
| COG0395    | ABC-type glycerol-3-phosphate transport system, permease component                                | 0         | 0         | 0        | 0        | 7          | 3         | 17         | 1         |
| COG3839    | ABC-type sugar transport system, ATPase component                                                 | 0         | 0         | 0        | 0        | 7          | 5         | 21         | 0         |
| COG1129    | ABC-type sugar transport system, ATPase component                                                 | 0         | 0         | 0        | 0        | 5          | 1         | 10         | 0         |
| COG1879    | ABC-type sugar transport system, periplasmic component, contains N-terminal xre family HTH domain | 0         | 3         | 0        | 0        | 3          | 1         | 14         | 0         |
| COG1175    | ABC-type sugar transport system, permease component                                               | 0         | 0         | 0        | 0        | 7          | 3         | 18         | 0         |
| COG4213    | ABC-type xylose transport system, periplasmic component                                           | 0         | 0         | 0        | 0        | 0          | 0         | 2          | 0         |
| COG4214    | ABC-type xylose transport system, permease component                                              | 0         | 0         | 0        | 0        | 0          | 0         | 3          | 0         |
| COG0471    | Di- and tricarboxylate transporter                                                                | 0         | 0         | 0        | 0        | 0          | 1         | 0          | 0         |
| COG0738    | Fucose permease                                                                                   | 0         | 0         | 0        | 0        | 0          | 0         | 1          | 1         |
| COG0580    | Glycerol uptake facilitator and related aquaporins (Major Intrinsic Protein Family)               | 0         | 0         | 0        | 0        | 2          | 0         | 0          | 0         |
| COG2211    | Na <sup>+</sup> /melibiose symporter or related transporter                                       | 0         | 0         | 0        | 0        | 0          | 0         | 0          | 1         |
| COG2893    | Phosphotransferase system, mannose/fructose-specific component IIA                                | 1         | 1         | 1        | 1        | 1          | 1         | 1          | 0         |
| COG2814    | Predicted arabinose efflux permease, MFS family                                                   | 4         | 4         | 3        | 3        | 35         | 13        | 11         | 5         |
| COG1172    | Ribose/xylose/arabinose/galactoside ABC-type transport system, permease component                 | 0         | 0         | 0        | 0        | 5          | 2         | 12         | 0         |
| COG2271    | Sugar phosphate permease                                                                          | 1         | 1         | 1        | 1        | 9          | 0         | 0          | 0         |
| COG1593    | TRAP-type C4-dicarboxylate transport system, large permease component                             | 2         | 1         | 0        | 0        | 7          | 7         | 6          | 0         |
| COG1638    | TRAP-type C4-dicarboxylate transport system, periplasmic component                                | 2         | 1         | 0        | 0        | 8          | 9         | 6          | 0         |
| COG3090    | TRAP-type C4-dicarboxylate transport system, small permease component                             | 2         | 1         | 0        | 0        | 5          | 7         | 5          | 0         |
| COG0697    | Permease of the drug/metabolite transporter (DMT) superfamily                                     | 0         | 3         | 0        | 0        | 9          | 5         | 4          | 0         |
| COG1682    | ABC-type polysaccharide/polyol phosphate export permease                                          | 1         | 1         | 1        | 1        | 3          | 1         | 1          | 1         |
| COG1134    | ABC-type polysaccharide/polyol phosphate transport system, ATPase component                       | 0         | 0         | 1        | 1        | 2          | 1         | 1          | 1         |
| COG2610    | H <sup>+</sup> /gluconate symporter or related permease                                           | 0         | 0         | 0        | 0        | 0          | 0         | 0          | 1         |
| COG1762    | Phosphotransferase system mannitol/fructose-specific IIA domain (Ntr-type)                        | 1         | 1         | 1        | 1        | 1          | 1         | 0          | 0         |
| <b>Sum</b> |                                                                                                   | <b>14</b> | <b>17</b> | <b>8</b> | <b>8</b> | <b>124</b> | <b>64</b> | <b>150</b> | <b>11</b> |
